# Supplementary material for: Aberrant Lymphatic Endothelial Progenitors in Lymphatic Malformation Development
Source: PubMed Central journal article supplement (PMC4342011; doi:10.1371/journal.pone.0117352), 2015-02-26
Supplement: pone.0117352.s001.pdf [file pone.0117352.s001.pdf]

**Table I. Summary of LM tissues and cells analyzed**

| No. | Subtype Location | IHC Tissue | IHC Cells | FACS | qRT-PCR | Differentiation Assays | LM Model |
|-----|------------------|------------|-----------|------|---------|------------------------|----------|
| 1   | Mixed CF         | X          |           |      |         |                        |          |
| 2   | GLA              | X          |           |      |         |                        |          |
| 3   | Gorham's Stout   | X          |           |      |         |                        |          |
| 4   | Mixed CF         | X          | X         | X    | X       | X                      | X        |
| 5   | Mixed Limb       | X          |           |      |         |                        |          |
| 6   | Macro CF         |            | X         | X    | X       |                        |          |
| 7   | Macro SC         | X          | X         | X    | X       | X                      | X        |
| 8   | Macro Mes        | X          | X         | X    | X       | X                      | X        |
| 9   | GLA              |            | X         | X    | X       | X                      | X        |
| 10  | Macro CF         |            | X         | X    | X       | X                      | X        |
| 11  | Micro Mes        |            | X         | X    | X       | X                      | X        |
| 12  | Macro SC         |            | X         | X    | X       | X                      |          |
| 13  | GLA              |            |           | X    | X       |                        |          |
| 14  | Micro SC         | X          |           |      |         |                        |          |

CF – cervicofacial, GLA – generalized lymphatic anomaly, Macro – macrocystic LM, Mes – mesenteric LM, Micro – microcystic LM, Mixed - mixed micro/macrocytic LM, SC – subcutaneous, IHC- immunohistochemistry, FACS - Fluorescent-activated cell sorting, qRT-PCR – quantitative RT-PCR.

**Table II. Antibodies**

| <b>Antigen</b> | <b>Method</b>           | <b>Company</b>  | <b>Catalogue #</b>                                     |
|----------------|-------------------------|-----------------|--------------------------------------------------------|
| $\alpha$ SMA   | IHC cells               | Sigma           | A2547                                                  |
| CD11b          | FACS                    | BD Biosciences  | 562793 (FITC-conjugated)                               |
| CD133          | Cell isolation          | Miltenyi Biotec | 130-097-049                                            |
|                | IHC tissue              | Miltenyi Biotec | 130-090-664                                            |
| CD146          | FACS                    | Millipore       | MAB16985F (FITC-conjugated)                            |
| CD31           | FACS                    | Ancell          | 180-040 (FITC-conjugated)                              |
|                | IHC cells               | abcam           | ab32457                                                |
| CD34           | FACS                    | BD Biosciences  | 550619 (PE-conjugated)                                 |
| CD90           | FACS                    | BD Biosciences  | 555595 (FITC-conjugated)                               |
|                |                         |                 | 555596 (PE-conjugated)                                 |
| GFP            | IHC tissue              | Invitrogen      | A-11122                                                |
| LYVE1          | IHC tissue              | R&D systems     | AF2089                                                 |
|                | IH cells                |                 |                                                        |
| NG2            | IHC tissue              | Millipore       | AB5320                                                 |
|                | IH cells                |                 |                                                        |
| podoplanin     | FACS                    | Angiobio        | 11-009PE (PE-conjugate)<br>17-9381-42 (APC-conjugated) |
|                | IHC tissue<br>IHC cells | Angiobio        | 11-003                                                 |
|                | IHC tissue              | R&D systems     | AF3670                                                 |
| Prox1          | IHC tissue              | R&D systems     | AF2727                                                 |
| VE-cadherin    | FACS                    | R&D systems     | FAB9381P (PE-conjugated)                               |
|                | IHC cells               | abcam           | ab7047                                                 |
| VEGFR-2        | FACS                    | R&D Systems     | FAB357P (PE-conjugated)                                |
| VEGFR-3        | FACS                    | R&D Systems     | FAB3492P (PE-conjugated)                               |
|                | Tissue IHC              | R&D Systems     | AF349                                                  |

**Table III. Quantitative RT-PCR Primers**

| <b>Gene</b>    | <b>Upper Primer</b>             | <b>Lower Primer</b>             |
|----------------|---------------------------------|---------------------------------|
| $\beta$ -actin | 5' CGAGGCCAGAGCAAGAGAG 3'       | 5' CTCGTAGATGGGCACAGTGTG 3'     |
| c-Kit          | 5' CTGGGATTTTCTCTGCGTTC 3'      | 5' GCCCACGCGGACTATTAAGT 3'      |
| LYVE1          | 5' TAGCTTTGAAACTTGCAGCTATG 3'   | 5' TCAACAAATGGTTCAGTTTCTGTAG 3' |
| NANOG          | 5' GATTTGTGGGCCTGAAGAAA 3'      | 5' AAGTGGGTTGTTTGCCTTTG 3'      |
| Oct4           | 5' GACAACAATGAGAACCCTCAGGAGA 3' | 5' CTGGCGCCGGTTACAGAACCA 3'     |
| Podoplanin     | 5' CCCAGGAGAGCAACAACCACTCAAC 3' | 5' CTCGATGCGAATGCCTGTTAC 3'     |
| Prox1          | 5' ACGTAAAGTTCAACAGATGCATTAC 3' | 5' CCAGCTTGCAGATGACCTTG 3'      |
| Sox2           | 5' GCGAACCATCTCTGTGGTCT 3'      | 5' GGAAAGTTGGGATCGAACAA 3'      |
| VE-cadherin    | 5' TGTGACAGCAGTGGATGCAGA 3'     | 5' CTGTACTTGGTCATCCGGTTCTG 3'   |
| VEGFR-1        | 5' GAAGGAGAGGACCTGAAACTGTC 3'   | 5' ACTCTTTCAATAAACAGCGTGCTG 3'  |
| VEGFR-2        | 5' GGACTGGCTTTGGCCCAAT 3'       | 5' CTTGCTGTCCCAGGAAATTCTG 3'    |
| VEGFR-3        | 5' GAGACCTGGCTGCTCGGAAC 3'      | 5' TCAGCATGATGCGGCGTATG 3'      |
