# Supplementary material for: Aberrant Lymphatic Endothelial Progenitors in Lymphatic Malformation Development
Source: PubMed Central journal article supplement (PMC4342011; doi:10.1371/journal.pone.0117352), 2015-02-26
Supplement: pone.0117352.s002.pdf [file pone.0117352.s002.pdf]

Wu et al. Figure I

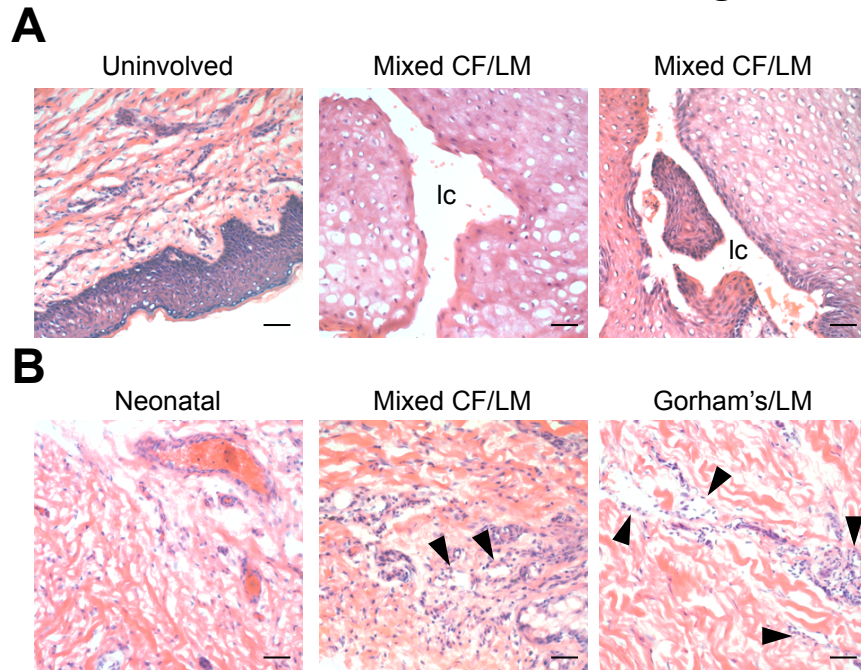

**Figure S1. LM tissues histology.** (A) H&E staining of patient-matched uninvolved and mixed cervicofacial (Mixed CF) LM tissues. (B) H&E staining of neonatal control tissue, Mixed CF LM or Gorham's tissues. Arrowheads mark abnormal lymphatic vessels. Scale bars: 50  $\mu$ m. lymphatic channel (lc)

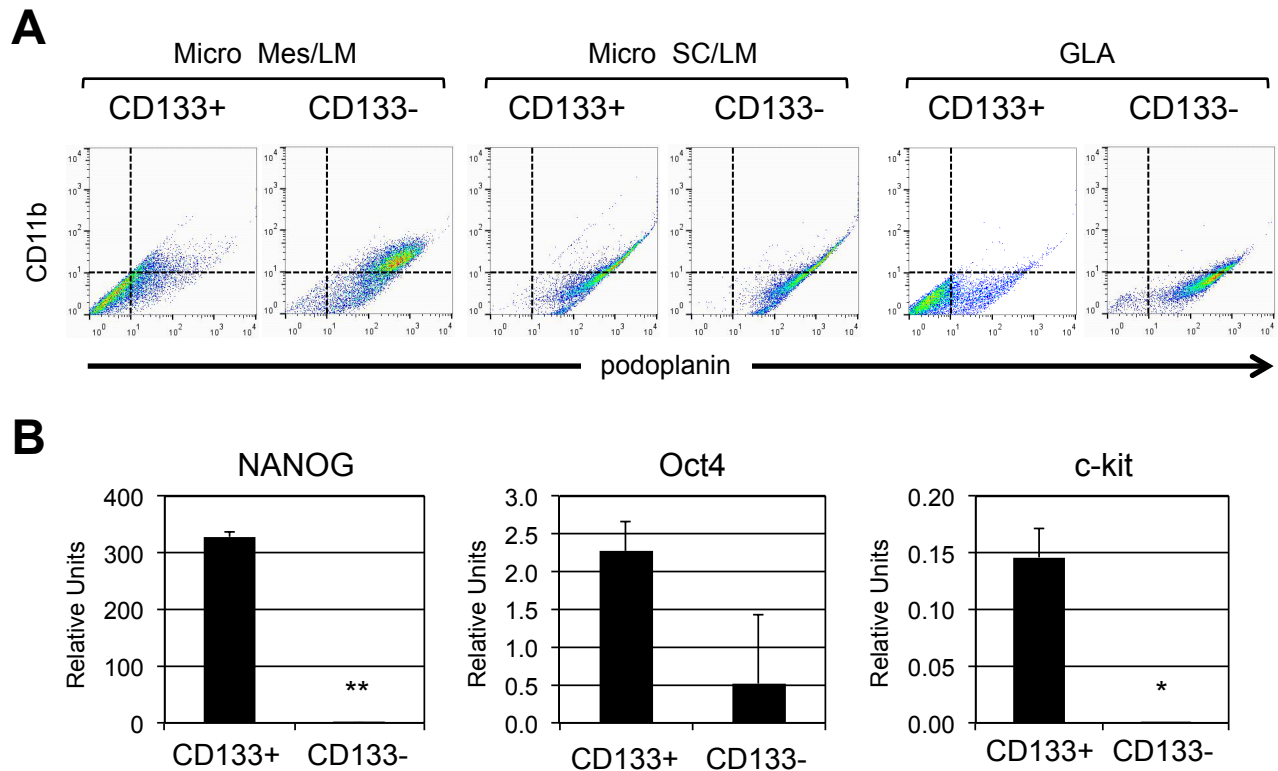

**Figure S2. Analysis of progenitor and stem cell markers in CD133<sup>+</sup> and CD133<sup>-</sup> LM cells.** (A) CD11b and podoplanin FACS of patient-matched CD133<sup>+</sup> and CD133<sup>-</sup> LM cells isolated from microcystic mesenteric (Micro Mes) LM, microcystic subcutaneous (Micro SC) LM and general lymphatic anomaly (GLA) specimens. (B) NANOG, Oct4 and c-Kit qRT-PCR of RNA isolated from patient-matched CD133<sup>+</sup> and CD133<sup>-</sup> LM cells isolated from a macrocystic mesenteric LM. Data normalized to  $\beta$ -actin qRT-PCR and represented as mean  $\pm$  s.e.m. \*  $p < 0.01$ , \*\*  $p < 0.0005$ .

## Wu et al. Figure III

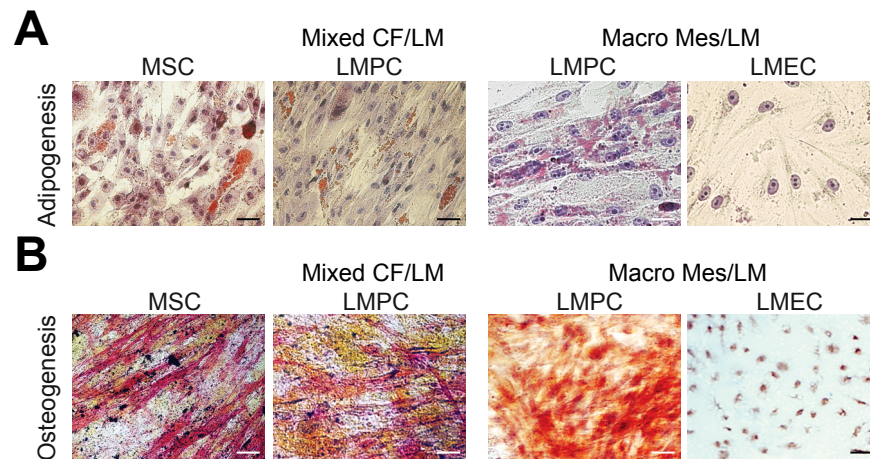

### Figure S3. LMPCs and not LMECs were multipotent.

(A) Oil Red O staining of MSCs, LMPCs isolated from mixed cervical facial (Mixed CF) LM and patient-matched LMPCs and LMECs isolated from macrocystic mesenteric (Macro Mes) LM after 2 weeks in adipogenic media. (B) Alkaline phosphatase staining of MSC, LMPCs isolated from Mixed CF LM and patient matched LMPCs and LMECs isolated from Macro Mes LM after 2 weeks in osteogenic media. Scale bars: 50  $\mu$ m.

Wu et al. Figure IV

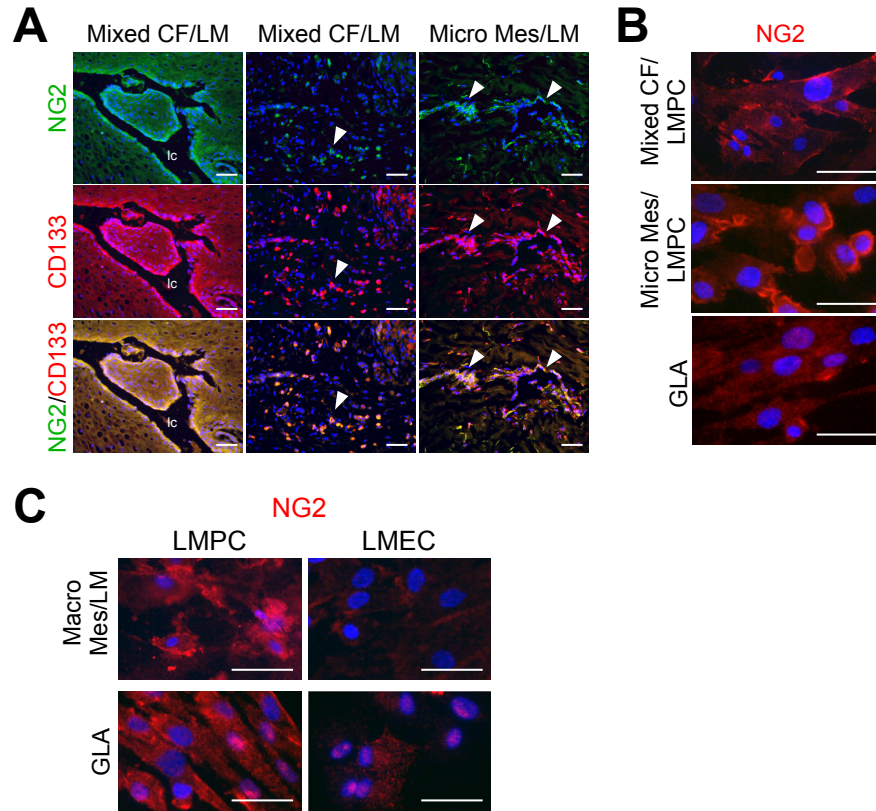

**Figure S4. LMPCs expressed NG2.** (A) NG2 and CD133 staining of mixed cervical facial (Mixed CF) and microcystic mesenteric (Micro Mes) LM tissues. White arrowheads mark abnormal lymphatic vessels. (B) NG2 staining of CD133<sup>+</sup> LM cells isolated from Mixed CF LM, Micro Mes LM tissues and generalized lymphatic anomaly (GLA) specimens. (C) NG2 staining of patient-matched CD133<sup>+</sup> LMPCs and CD133<sup>-</sup> LMECs isolated from macrocystic mesenteric (Macro Mes) LM and GLA. Scale bars: 50  $\mu$ m. lymphatic channel (lc)

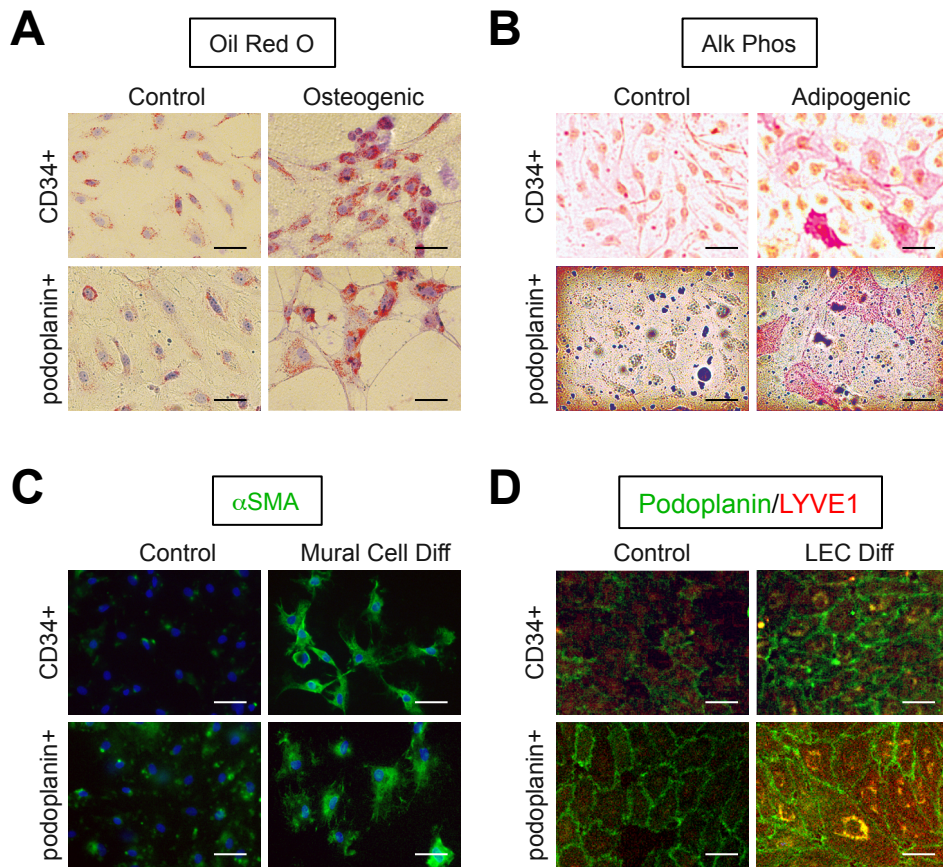

**Figure S5. CD34<sup>+</sup> and podoplanin<sup>+</sup> LMPCs were multipotent.** LMPCs isolated from a microcystic subcutaneous were sorted for CD34 or podoplanin positivity and induced to differentiate into fat, bone, VSMCs and LECs. **(A)** Oil Red O staining of CD34<sup>+</sup> or podoplanin<sup>+</sup> LMPCs after 2 weeks in growth media (control) or adipogenic media. **(B)** Alkaline phosphatase (Alk Phos) staining of CD34<sup>+</sup> or podoplanin<sup>+</sup> LMPCs after 2 weeks in growth media (control) or osteogenic media. **(C)** Alpha smooth muscle actin ( $\alpha$ SMA) staining of CD34<sup>+</sup> or podoplanin<sup>+</sup> LMPCs after 2 weeks in growth media (control) or mural cell differentiation (Diff) media. **(D)** Podoplanin and LYVE1 staining of CD34<sup>+</sup> or podoplanin<sup>+</sup> LMPCs after 2 weeks in growth media (control) or LEC differentiation (Diff) media. Scale bars: 50  $\mu$ m.

Wu et al. Figure VI

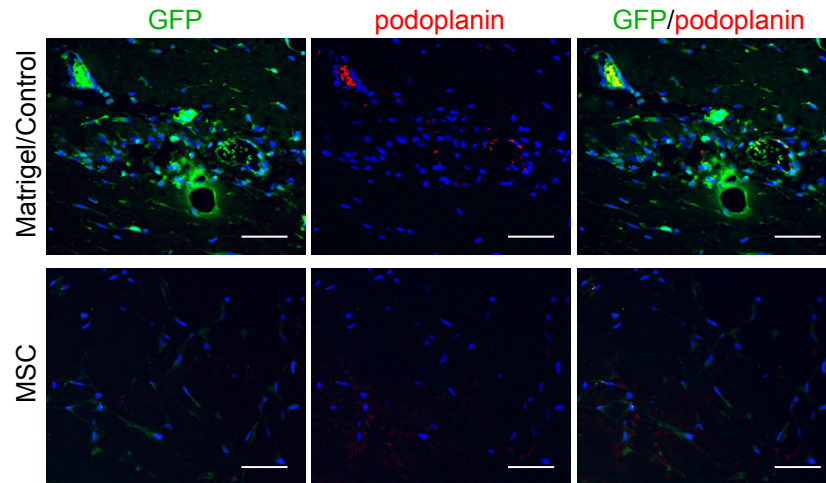

**Figure S6. Analysis of control implants.** Matrigel alone or MSCs suspended in Matrigel was implanted into GFP-expressing immunocompromised mice. GFP (host cell) and podoplanin staining of xenograft sections. Scale bars: 50  $\mu\text{m}$ .
